# Supplementary material
Source: MDPI journal article supplement (https://www.mdpi.com/2035-8377/15/1/2)

Figure S1. PRISMA 2020 flowchart

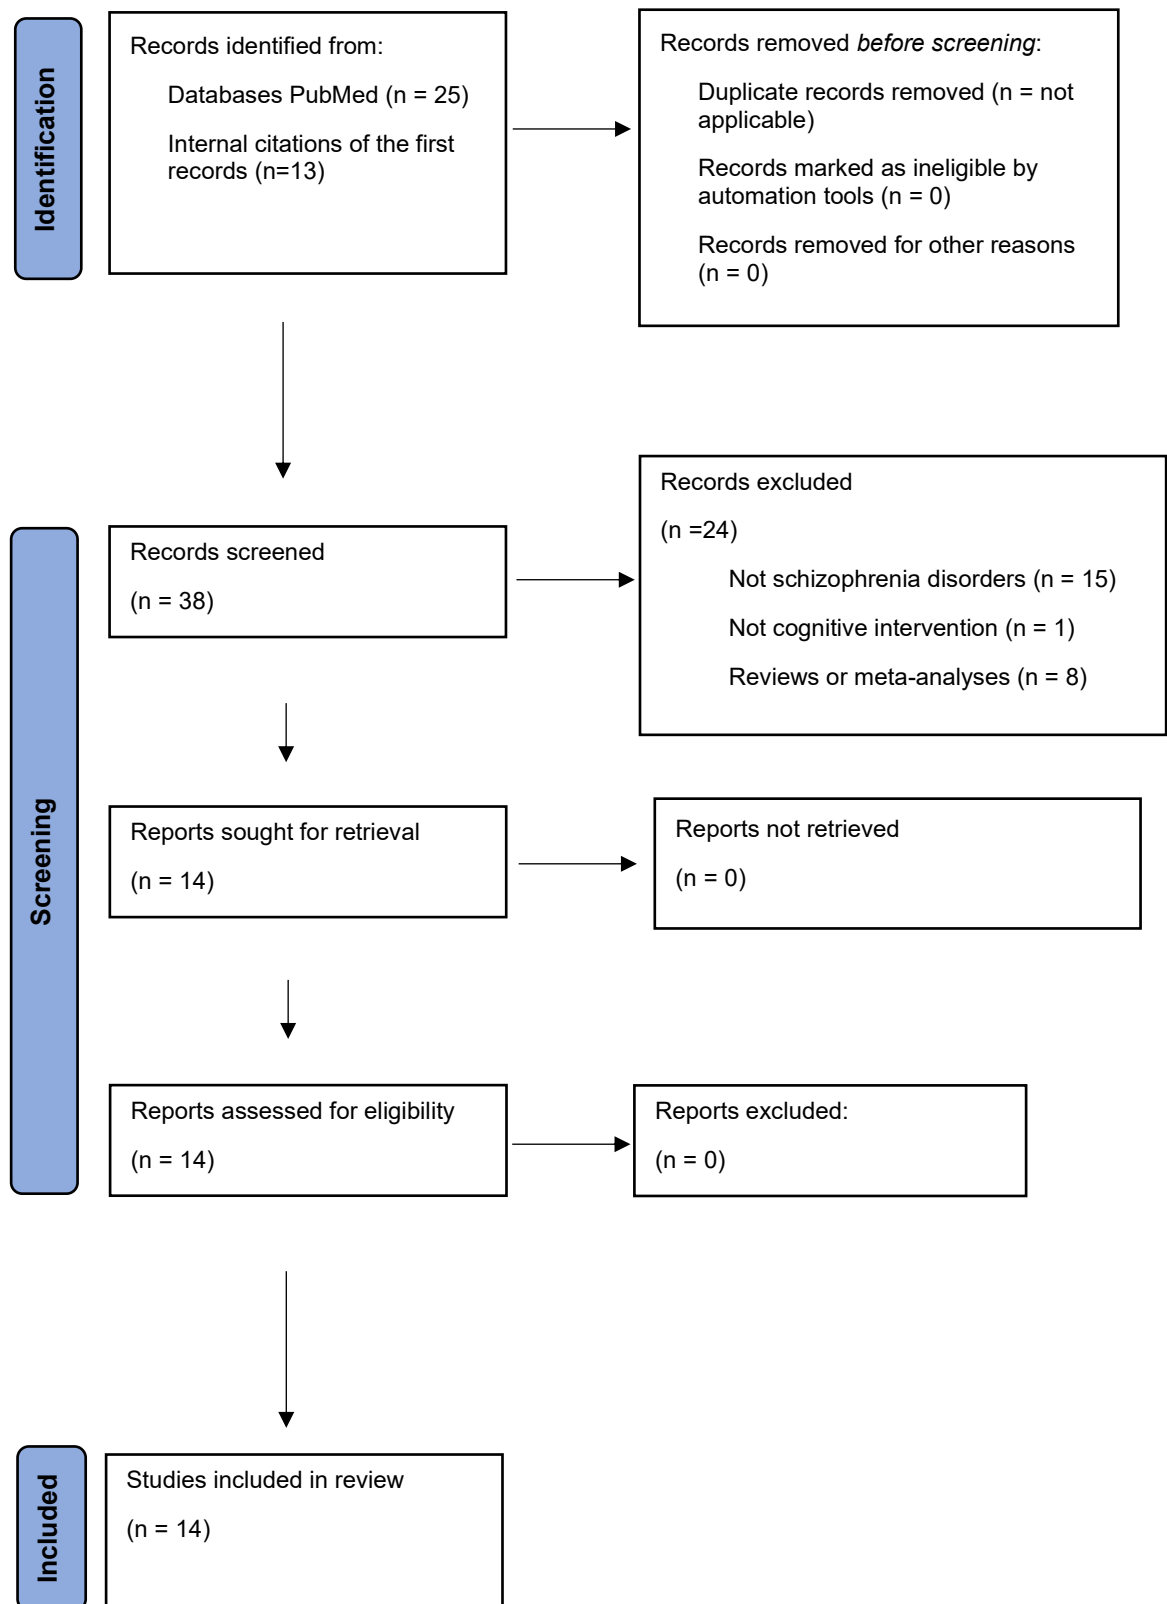

Supplement: s1 [file s1]
